# Supplementary material for: Longitudinal Assessment of Resident Performance Using Entrustable Professional Activities
Source: PubMed Central journal article supplement (PMC6991321; doi:10.1001/jamanetworkopen.2019.19316), 2020-01-15
Supplement: jamanetwopen-3-e1919316-s001.pdf [file jamanetwopen-3-e1919316-s001.pdf]

## Supplementary Online Content

Schumacher DJ, West DC, Schwartz A, et al; Association of Pediatric Program Directors Longitudinal Educational Assessment Research Network General Pediatrics Entrustable Professional Activities Study Group. Longitudinal assessment of resident performance using entrustable professional activities. *JAMA Netw Open*. 2020;3(1):e1919316. doi:10.1001/jamanetworkopen.2019.19316

**eTable 1.** Association of Pediatric Program Director Longitudinal Educational Assessment Research Network Participating Sites

**eTable 2.** Cross-sectional Distribution of Residents Across Data Collection Cycles

**eFigure.** Supervision Level at Graduation for 17 General Pediatrics Entrustable Professional Activities

This supplementary material has been provided by the authors to give readers additional information about their work.

**eTable 1: Association of Pediatric Program Director Longitudinal Educational Assessment Research Network Participating Sites**

| <b>Program</b>                                                | <b>Total Categorical Pediatrics Residents Per Study Year Participation</b> |
|---------------------------------------------------------------|----------------------------------------------------------------------------|
| Baylor University/Texas Children's Hospital                   | 2015-2016: 105<br>2016-2017: 106<br>2017-2018: 104                         |
| Cincinnati Children's Hospital Medical Center                 | 2015-2016: 120<br>2016-2017: 120<br>2017-2018: 120                         |
| Colorado Children's Hospital                                  | 2015-2016: 88<br>2016-2017: 88<br>2017-2018: 89                            |
| Dartmouth                                                     | 2015-2016: 21<br>2016-2017: 21<br>2017-2018: Did not participate           |
| Mayo Clinic                                                   | 2015-2016: 36<br>2016-2017: 36<br>2017-2018: 37                            |
| Medical College of Georgia                                    | 2015-2016: 45<br>2016-2017: 45<br>2017-2018: 45                            |
| Helen DeVos Children's Hospital/<br>Michigan State University | 2015-2016: 42<br>2016-2017: 43<br>2017-2018: 44                            |
| New York University                                           | 2015-2016: 54<br>2016-2017: 54<br>2017-2018: 54                            |
| Rainbow Babies and Children's Hospital                        | 2015-2016: 68<br>2016-2017: 75<br>2017-2018: 74                            |
| Rutgers University                                            | 2015-2016: 31<br>2016-2017: 28<br>2017-2018: 29                            |
| Seattle Children's Hospital                                   | 2015-2016: 111<br>2016-2017: 111<br>2017-2018: 118                         |
| Stony Brook University                                        | 2015-2016: 35<br>2016-2017: 35<br>2017-2018: 35                            |
| University of California, Davis                               | 2015-2016: 38<br>2016-2017: 36<br>2017-2018: 36                            |
| University of California, San Francisco                       | 2015-2016: 84<br>2016-2017: 80                                             |

|                                  |                                                                                                                    |
|----------------------------------|--------------------------------------------------------------------------------------------------------------------|
|                                  | 2017-2018: 81                                                                                                      |
| University of Florida            | 2015-2016: 53<br>2016-2017: 52<br>2017-2018: 50                                                                    |
| University of Maryland           | 2015-2016: 45<br>2016-2017: 45<br>2017-2018: 45                                                                    |
| University of Minnesota          | 2015-2016: 71<br>2016-2017: 73<br>2017-2018: 74                                                                    |
| University of North Carolina     | 2015-2016: 60<br>2016-2017: 58<br>2017-2018: 58                                                                    |
| University of Utah               | 2015-2016: Did not participate<br>2016-2017: 65 (participated in second data collection for year)<br>2017-2018: 66 |
| University of South Dakota       | 2015-2016: 18<br>2016-2017: 18<br>2017-2018: 18                                                                    |
| Virginia Commonwealth University | 2015-2016: 47<br>2016-2017: 46<br>2017-2018: 49                                                                    |
| Western Michigan University      | 2015-2016: 23<br>2016-2017: 24<br>2017-2018: 24                                                                    |

**eTable 2: Cross Sectional Distribution of Residents Across Data Collection Cycles**

| <b>Post-Graduate Year</b> | <b>Spring 2016</b> | <b>Fall 2016</b> | <b>Spring 2017</b> | <b>Fall 2017</b> | <b>Spring 2018</b> |
|---------------------------|--------------------|------------------|--------------------|------------------|--------------------|
| 1                         | 353                | 0                | 392                | 0                | 425                |
| 2                         | 346                | 374              | 397                | 385              | 417                |
| 3                         | 276                | 362              | 374                | 363              | 392                |

**eFigure. Supervision Level at Graduation for 17 General Pediatrics Entrustable Professional Activities**

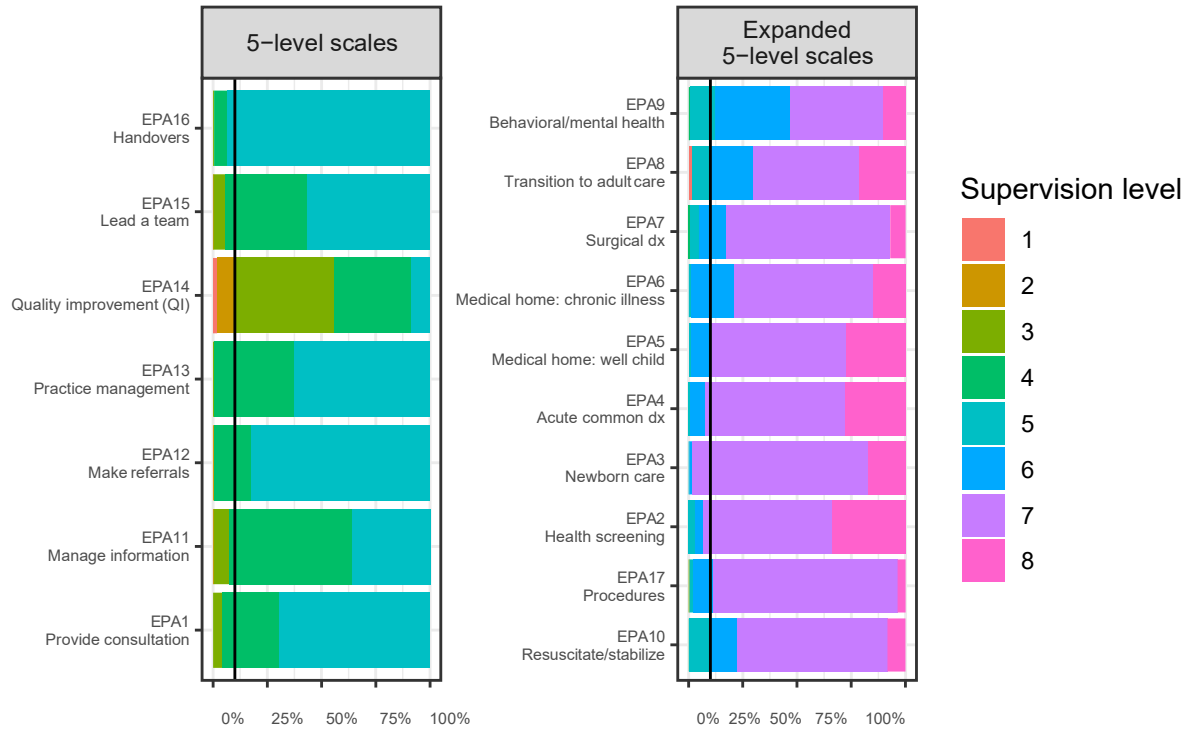

Abbreviations: PGY (post-graduate year), EPA (entrustable professional activity), Dx (diagnosis).

Please see Table 1 in the main article for full description of EPAs and supervision level scales. The black line indicates the level achieved by at least 90% of graduates.
